# Supplementary material for: Validation of the World Health Organization Tool for Situational Analysis to Assess Emergency and Essential Surgical Care at District Hospitals in Ghana
Source: Springer Nature journal article supplement (doi:10.1007/s00268-010-0918-1), 2010-12-28
Supplement: MOESM1 [file 8256404]

|                                                                 | All the time          | Sometimes             | Not available         |
|-----------------------------------------------------------------|-----------------------|-----------------------|-----------------------|
| Do you have Oxygen cylinder supply?                             | <input type="radio"/> | <input type="radio"/> | <input type="radio"/> |
| Do you have Oxygen concentrator supply?                         | <input type="radio"/> | <input type="radio"/> | <input type="radio"/> |
| Do you have running water?                                      | <input type="radio"/> | <input type="radio"/> | <input type="radio"/> |
| Do you have electricity source?                                 | <input type="radio"/> | <input type="radio"/> | <input type="radio"/> |
| Do you have an operational power generator?                     | <input type="radio"/> | <input type="radio"/> | <input type="radio"/> |
| Do you have functioning anaesthesia machine?                    | <input type="radio"/> | <input type="radio"/> | <input type="radio"/> |
| Do you keep medical records ?                                   | <input type="radio"/> | <input type="radio"/> | <input type="radio"/> |
| Do you have an area designated for Emergency care?              | <input type="radio"/> | <input type="radio"/> | <input type="radio"/> |
| Do you have an area designated for Postoperative care?          | <input type="radio"/> | <input type="radio"/> | <input type="radio"/> |
| Do you have management guidelines available for Emergency care? | <input type="radio"/> | <input type="radio"/> | <input type="radio"/> |
| Do you have management guidelines available for Surgery?        | <input type="radio"/> | <input type="radio"/> | <input type="radio"/> |
| Do you have management guidelines available for Anesthesia?     | <input type="radio"/> | <input type="radio"/> | <input type="radio"/> |
| Do you have management guidelines available for Pain Relief?    | <input type="radio"/> | <input type="radio"/> | <input type="radio"/> |
| Do you have blood bank available at the facility?               | <input type="radio"/> | <input type="radio"/> | <input type="radio"/> |
| Do you have facility to test haemoglobin & urine?               | <input type="radio"/> | <input type="radio"/> | <input type="radio"/> |
| Do you have functioning X-ray machine available ?               | <input type="radio"/> | <input type="radio"/> | <input type="radio"/> |

### Section B: Human Resources

|                                                                | Number of Full Time Workers                           | Number of Part Time Workers                           | Number Certified/Registered/Licensed                  |
|----------------------------------------------------------------|-------------------------------------------------------|-------------------------------------------------------|-------------------------------------------------------|
| Surgeons (qualified)                                           | <input type="text"/><br>The input is of type "number" | <input type="text"/><br>The input is of type "number" | <input type="text"/><br>The input is of type "number" |
| Anaesthesiologist Physician (qualified)                        | <input type="text"/><br>The input is of type "number" | <input type="text"/><br>The input is of type "number" | <input type="text"/><br>The input is of type "number" |
| Obstetrician/gynecologist (qualified)                          | <input type="text"/><br>The input is of type "number" | <input type="text"/><br>The input is of type "number" | <input type="text"/><br>The input is of type "number" |
| General doctors providing surgery                              | <input type="text"/><br>The input is of type "number" | <input type="text"/><br>The input is of type "number" | <input type="text"/><br>The input is of type "number" |
| General doctors providing anesthesia                           | <input type="text"/><br>The input is of type "number" | <input type="text"/><br>The input is of type "number" | <input type="text"/><br>The input is of type "number" |
| Nurse/Clinical/Assistant medical officers providing anesthesia | <input type="text"/><br>The input is of type "number" | <input type="text"/><br>The input is of type "number" | <input type="text"/><br>The input is of type "number" |
| Clinical/Assistant medical officers providing surgery          | <input type="text"/><br>The input is of type "number" | <input type="text"/><br>The input is of type "number" | <input type="text"/><br>The input is of type "number" |
| Paramedics/Midwives                                            | <input type="text"/><br>The input is of type "number" | <input type="text"/><br>The input is of type "number" | <input type="text"/><br>The input is of type "number" |

"number"

"number"

### Section C: Interventions - Do you provide these procedures?

|                                                                                                               | Yes / No                                                 | Do you refer?                                            | Refer due to lack of skills                              | Refer due to non-functional equipment                    | Refer due to lack of Supplies/Drugs                      |
|---------------------------------------------------------------------------------------------------------------|----------------------------------------------------------|----------------------------------------------------------|----------------------------------------------------------|----------------------------------------------------------|----------------------------------------------------------|
| Resuscitation (airway, hemorrhage, peripheral percutaneous intravenous access, peripheral venous cut down)    | yes <input type="checkbox"/> no <input type="checkbox"/> |
| Cricothyroidotomy /Tracheostomy                                                                               | yes <input type="checkbox"/> no <input type="checkbox"/> |
| Chest tube insertion                                                                                          | yes <input type="checkbox"/> no <input type="checkbox"/> |
| Removal of foreign body (throat/eye/ear/nose)                                                                 | yes <input type="checkbox"/> no <input type="checkbox"/> |
| Acute burn management                                                                                         | yes <input type="checkbox"/> no <input type="checkbox"/> |
| Incision & drainage of abscess                                                                                | yes <input type="checkbox"/> no <input type="checkbox"/> |
| Suturing (for wounds, episiotomy, cervical & vaginal lacerations)                                             | yes <input type="checkbox"/> no <input type="checkbox"/> |
| Wound debridement                                                                                             | yes <input type="checkbox"/> no <input type="checkbox"/> |
| Cesarean Section                                                                                              | yes <input type="checkbox"/> no <input type="checkbox"/> |
| Dilatation & Curettage gyn/obstetrics                                                                         | yes <input type="checkbox"/> no <input type="checkbox"/> |
| Obstetric fistula repair                                                                                      | yes <input type="checkbox"/> no <input type="checkbox"/> |
| Appendectomy                                                                                                  | yes <input type="checkbox"/> no <input type="checkbox"/> |
| Hernia repair (strangulated, elective)                                                                        | yes <input type="checkbox"/> no <input type="checkbox"/> |
| Hydrocele                                                                                                     | yes <input type="checkbox"/> no <input type="checkbox"/> |
| Cystostomy                                                                                                    | yes <input type="checkbox"/> no <input type="checkbox"/> |
| Urethral stricture dilatation                                                                                 | yes <input type="checkbox"/> no <input type="checkbox"/> |
| Laparotomy (uterine rupture, ectopic pregnancy, acute abdomen, intestinal obstruction, perforation, injuries) | yes <input type="checkbox"/> no <input type="checkbox"/> |
| Male circumcision                                                                                             | yes <input type="checkbox"/> no <input type="checkbox"/> |
| Congenital hernia repair                                                                                      | yes <input type="checkbox"/> no <input type="checkbox"/> |
| Neonatal surgery: abdominal wall defect, colostomy imperforate anus, intussusceptions                         | yes <input type="checkbox"/> no <input type="checkbox"/> |

|                                            |                                 |                                |                                 |                                |                                 |                                |                                 |                                |                                 |                                |
|--------------------------------------------|---------------------------------|--------------------------------|---------------------------------|--------------------------------|---------------------------------|--------------------------------|---------------------------------|--------------------------------|---------------------------------|--------------------------------|
| Cleft lip repair                           | yes<br><input type="checkbox"/> | no<br><input type="checkbox"/> |
| Clubfoot repair                            | yes<br><input type="checkbox"/> | no<br><input type="checkbox"/> |
| Contracture release/skin grafting          | yes<br><input type="checkbox"/> | no<br><input type="checkbox"/> |
| Closed Treatment of Fracture               | yes<br><input type="checkbox"/> | no<br><input type="checkbox"/> |
| Open Treatment of Fracture                 | yes<br><input type="checkbox"/> | no<br><input type="checkbox"/> |
| Joint Dislocation treatment                | yes<br><input type="checkbox"/> | no<br><input type="checkbox"/> |
| Drainage of Osteomyelitis/Septic Arthritis | yes<br><input type="checkbox"/> | no<br><input type="checkbox"/> |
| Amputation                                 | yes<br><input type="checkbox"/> | no<br><input type="checkbox"/> |
| Biopsy (lymph node, mass, other)           | yes<br><input type="checkbox"/> | no<br><input type="checkbox"/> |
| Tubal ligation/Vasectomy                   | yes<br><input type="checkbox"/> | no<br><input type="checkbox"/> |
| Cataract surgery                           | yes<br><input type="checkbox"/> | no<br><input type="checkbox"/> |
| Regional anesthesia blocks                 | yes<br><input type="checkbox"/> | no<br><input type="checkbox"/> |
| Spinal anaesthesia                         | yes<br><input type="checkbox"/> | no<br><input type="checkbox"/> |
| Ketamine intravenous anaesthesia           | yes<br><input type="checkbox"/> | no<br><input type="checkbox"/> |
| General anaesthesia inhalational           | yes<br><input type="checkbox"/> | no<br><input type="checkbox"/> |

### Section D: Emergency Equipment and Supplies for Resuscitation

For details refer WHO IMEESC toolkit [www.who.int/surgery/publications/imeesc](http://www.who.int/surgery/publications/imeesc); WHO ETC guidelines [www.who.int/violence\\_injury\\_prevention/services](http://www.who.int/violence_injury_prevention/services); WHOEML [www.who.int/medicines/publications](http://www.who.int/medicines/publications)

|                                            | 0 absent                 | 1 available with frequent shortages or difficulties | 2 fully available for all the patients all of the time |
|--------------------------------------------|--------------------------|-----------------------------------------------------|--------------------------------------------------------|
| <b>Capital Outlays</b>                     | <input type="checkbox"/> | <input type="checkbox"/>                            | <input type="checkbox"/>                               |
| Resuscitator bag valve & mask (adult)      | <input type="checkbox"/> | <input type="checkbox"/>                            | <input type="checkbox"/>                               |
| Resuscitator bag valve & mask (paediatric) | <input type="checkbox"/> | <input type="checkbox"/>                            | <input type="checkbox"/>                               |
| Oxygen source: cylinder/concentrator       | <input type="checkbox"/> | <input type="checkbox"/>                            | <input type="checkbox"/>                               |
| Mask & Tubing to connect to oxygen supply  | <input type="checkbox"/> | <input type="checkbox"/>                            | <input type="checkbox"/>                               |
| Stethoscope                                | <input type="checkbox"/> | <input type="checkbox"/>                            | <input type="checkbox"/>                               |
| Batteries for flash light                  | <input type="checkbox"/> | <input type="checkbox"/>                            | <input type="checkbox"/>                               |
| Suction pump (manual or electric)          | <input type="checkbox"/> | <input type="checkbox"/>                            | <input type="checkbox"/>                               |
|                                            |                          |                                                     |                                                        |

|                                                  |                          |                          |                          |
|--------------------------------------------------|--------------------------|--------------------------|--------------------------|
| Blood pressure measuring equipment               | <input type="checkbox"/> | <input type="checkbox"/> | <input type="checkbox"/> |
| Thermometer                                      | <input type="checkbox"/> | <input type="checkbox"/> | <input type="checkbox"/> |
| Scalpel handle with blade                        | <input type="checkbox"/> | <input type="checkbox"/> | <input type="checkbox"/> |
| Retractor                                        | <input type="checkbox"/> | <input type="checkbox"/> | <input type="checkbox"/> |
| Scissors straight 12 cm                          | <input type="checkbox"/> | <input type="checkbox"/> | <input type="checkbox"/> |
| Scissors blunt 14 cm                             | <input type="checkbox"/> | <input type="checkbox"/> | <input type="checkbox"/> |
| Oropharyngeal airway (adult size)                | <input type="checkbox"/> | <input type="checkbox"/> | <input type="checkbox"/> |
| Oropharyngeal airway (paediatric size)           | <input type="checkbox"/> | <input type="checkbox"/> | <input type="checkbox"/> |
| Forceps Kocher no teeth                          | <input type="checkbox"/> | <input type="checkbox"/> | <input type="checkbox"/> |
| Forceps, artery                                  | <input type="checkbox"/> | <input type="checkbox"/> | <input type="checkbox"/> |
| Kidney dishes stainless steel                    | <input type="checkbox"/> | <input type="checkbox"/> | <input type="checkbox"/> |
| Capped bottle, alcohol based solutions           | <input type="checkbox"/> | <input type="checkbox"/> | <input type="checkbox"/> |
| Gloves (sterile) sizes 6 to 8                    | <input type="checkbox"/> | <input type="checkbox"/> | <input type="checkbox"/> |
| Gloves (examination)small, medium, large         | <input type="checkbox"/> | <input type="checkbox"/> | <input type="checkbox"/> |
| Needle holder                                    | <input type="checkbox"/> | <input type="checkbox"/> | <input type="checkbox"/> |
| Sterilizer                                       | <input type="checkbox"/> | <input type="checkbox"/> | <input type="checkbox"/> |
| Nail brush, scrubbing surgeon's                  | <input type="checkbox"/> | <input type="checkbox"/> | <input type="checkbox"/> |
| Vaginal speculum                                 | <input type="checkbox"/> | <input type="checkbox"/> | <input type="checkbox"/> |
| Bucket, plastic                                  | <input type="checkbox"/> | <input type="checkbox"/> | <input type="checkbox"/> |
| Drum for sterile compresses, bandages, dressings | <input type="checkbox"/> | <input type="checkbox"/> | <input type="checkbox"/> |
| Examination table                                | <input type="checkbox"/> | <input type="checkbox"/> | <input type="checkbox"/> |
| <b>Renewable Items</b>                           | <input type="checkbox"/> | <input type="checkbox"/> | <input type="checkbox"/> |
| Suction catheter sizes 16 FG                     | <input type="checkbox"/> | <input type="checkbox"/> | <input type="checkbox"/> |
| Tongue depressor wooden disposable               | <input type="checkbox"/> | <input type="checkbox"/> | <input type="checkbox"/> |
| Nasogastric tubes 10 to 16 FG                    | <input type="checkbox"/> | <input type="checkbox"/> | <input type="checkbox"/> |
| Light source (lamp & flash light)                | <input type="checkbox"/> | <input type="checkbox"/> | <input type="checkbox"/> |
| Intravenous fluid infusion set                   | <input type="checkbox"/> | <input type="checkbox"/> | <input type="checkbox"/> |
| IV cannula sizes 18,22, 24                       | <input type="checkbox"/> | <input type="checkbox"/> | <input type="checkbox"/> |
| Scalp vein infusion set                          | <input type="checkbox"/> | <input type="checkbox"/> | <input type="checkbox"/> |
| Syringes 2ml                                     | <input type="checkbox"/> | <input type="checkbox"/> | <input type="checkbox"/> |
| Syringes 10 ml                                   | <input type="checkbox"/> | <input type="checkbox"/> | <input type="checkbox"/> |
| Disposable needles # 25, 21,19                   | <input type="checkbox"/> | <input type="checkbox"/> | <input type="checkbox"/> |
| Sharps disposal container                        | <input type="checkbox"/> | <input type="checkbox"/> | <input type="checkbox"/> |
| Tourniquet                                       | <input type="checkbox"/> | <input type="checkbox"/> | <input type="checkbox"/> |
| Sterile gauze dressing                           | <input type="checkbox"/> | <input type="checkbox"/> | <input type="checkbox"/> |
| Bandages sterile                                 | <input type="checkbox"/> | <input type="checkbox"/> | <input type="checkbox"/> |
| Adhesive Tape                                    | <input type="checkbox"/> | <input type="checkbox"/> | <input type="checkbox"/> |
| Needles, cutting & round bodied (for suturing)   | <input type="checkbox"/> | <input type="checkbox"/> | <input type="checkbox"/> |
| Suture synthetic absorbable                      | <input type="checkbox"/> | <input type="checkbox"/> | <input type="checkbox"/> |

|                                                                        |                          |                          |                          |
|------------------------------------------------------------------------|--------------------------|--------------------------|--------------------------|
| Splints for arm, leg                                                   | <input type="checkbox"/> | <input type="checkbox"/> | <input type="checkbox"/> |
| Towel cloth                                                            | <input type="checkbox"/> | <input type="checkbox"/> | <input type="checkbox"/> |
| Absorbent cotton wool                                                  | <input type="checkbox"/> | <input type="checkbox"/> | <input type="checkbox"/> |
| Urinary catheter Foleys disposable #12, 14,18 with bag                 | <input type="checkbox"/> | <input type="checkbox"/> | <input type="checkbox"/> |
| Sheeting, plastic for examination table                                | <input type="checkbox"/> | <input type="checkbox"/> | <input type="checkbox"/> |
| Waste disposal container                                               | <input type="checkbox"/> | <input type="checkbox"/> | <input type="checkbox"/> |
| Face masks                                                             | <input type="checkbox"/> | <input type="checkbox"/> | <input type="checkbox"/> |
| Eye protection                                                         | <input type="checkbox"/> | <input type="checkbox"/> | <input type="checkbox"/> |
| Apron, utility plastic reusable                                        | <input type="checkbox"/> | <input type="checkbox"/> | <input type="checkbox"/> |
| Soap                                                                   | <input type="checkbox"/> | <input type="checkbox"/> | <input type="checkbox"/> |
| Wash basin                                                             | <input type="checkbox"/> | <input type="checkbox"/> | <input type="checkbox"/> |
| <b>Supplementary equipment for use by skilled health professionals</b> | <input type="checkbox"/> | <input type="checkbox"/> | <input type="checkbox"/> |
| Magills Forceps (paediatric)                                           |                          |                          |                          |
| Magills Forceps (adult)                                                | <input type="checkbox"/> | <input type="checkbox"/> | <input type="checkbox"/> |
| Endotracheal tubes uncuffed sizes 3.0 to 5.0)                          | <input type="checkbox"/> | <input type="checkbox"/> | <input type="checkbox"/> |
| Endotracheal tubes cuffed sizes 5.5 to 9                               | <input type="checkbox"/> | <input type="checkbox"/> | <input type="checkbox"/> |
| IV Infusor bags                                                        | <input type="checkbox"/> | <input type="checkbox"/> | <input type="checkbox"/> |
| Chest tubes insertion equipment                                        | <input type="checkbox"/> | <input type="checkbox"/> | <input type="checkbox"/> |
| Laryngoscope handle                                                    | <input type="checkbox"/> | <input type="checkbox"/> | <input type="checkbox"/> |
| Laryngoscope Macintosh blades (adult)                                  | <input type="checkbox"/> | <input type="checkbox"/> | <input type="checkbox"/> |
| Laryngoscope Macintosh blades (paediatric)                             | <input type="checkbox"/> | <input type="checkbox"/> | <input type="checkbox"/> |
| Spare bulbs, batteries for laryngoscope                                | <input type="checkbox"/> | <input type="checkbox"/> | <input type="checkbox"/> |
| Cricothyroidotomy set                                                  | <input type="checkbox"/> | <input type="checkbox"/> | <input type="checkbox"/> |

Submit the form
